# Supplementary material
Source: publisher figshare collection journal article supplement (https://gsajournals.figshare.com/ndownloader/files/12404516)
Supplement: Supplementary file 1 [file 12404516]

**Table S1:** *S. cerevisiae* strains used in this study.

| **Strain** | **Genotype** | **Reference** |
| --- | --- | --- |
| Y7092 | *MATα can1Δ::STE2pr-Sp_his5 lyp1∆ his3∆1 leu2∆0 ura3∆0 met15∆0 LYS2* | (Baryshnikova *et al.*, 2010a); Tong *et al*., 2004) |
| YMB6969 | *MATα can1Δ::STE2pr-Sp_his5 lyp1∆ his3∆1 leu2∆0 ura3∆0 met15∆0* LYS2 *cse4∆::GAL1pr-CSE4-3HA::NATMX* | This study |
| BY4741 | *MATa his3Δ1 leu2Δ0 met15Δ0 ura3Δ0* | Open Biosystems |
| YMB6714 | *MATα his3∆200 leu2∆1 lys2-801 ura3-52 ade2-101 trp1∆1 CENIII(CEN3L.YPH278) HIS3 SUP11 pRB467* | This study |
| YMB8886 | *MATa his3Δ1 leu2Δ0 met15Δ0 ura3Δ0 [HHT1-HHF1]∆16’::LEU2 [HTA1-HTB1]∆16’::URA3 pRB467* | This study |
| YMB7693 | *MATa hir2∆::KAN his3∆200 leu2∆1 lys2-801 ura3-52 ade2-101 trp1∆1 CENIII(CEN3L.YPH278) HIS3 SUP11* | This study |
